# Supplementary material
Source: PubMed Central journal article supplement (PMC3434706)
Supplement: NIHMS391161-supplement-Revised_Supplemental_Material.pdf [file NIHMS391161-supplement-Revised_Supplemental_Material.pdf]

# Unbiased Evaluation of Bioactive Secondary Metabolites in Complex Matrices

Taichi Inui<sup>a,b,1</sup>, Yuehong Wang<sup>a</sup>, Samuel M. Pro<sup>a,2</sup>, Scott G. Franzblau<sup>a</sup>,  
Guido F. Pauli<sup>a,b,\*</sup>

## Supplementary Material

<sup>a</sup>Institute for Tuberculosis Research and <sup>b</sup>Department of Medicinal Chemistry and Pharmacognosy, College of Pharmacy, University of Illinois at Chicago, Chicago, Illinois 60612, USA

\*Corresponding author at: Institute for Tuberculosis Research, College of Pharmacy, University of Illinois at Chicago, 833 S. Wood St., Chicago, Illinois 60612, USA, tel.: +1-312-355-1949, fax.: +1-312-355-2693, e-mail: gfp@uic.edu

<sup>1</sup>T. Inui (current address): Wm. Wrigley Jr. Company, Chicago, Illinois 60642, USA

<sup>2</sup>S. Pro (current address): Cherry Instruments, Chicago, Illinois 60614, USA

**Table S1. Subgroups of GC Chromatograms.** Each of the seven subgroups consisted of several fractions as shown. The number of fractions contained in each subgroup impacted the threshold used to determine positive matches (assignment of bioactives) in the next Stage 4 (See Table S2). The Target fraction was the fraction chosen to generate the reference chromatogram for the GC peak alignment in any given subgroup.

| Subgroup | Fractions | # of fractions | Biopeaks | Target fraction# |
|----------|-----------|----------------|----------|------------------|
| 1        | 1-12      | 12             | 1-3      | 7                |
| 2        | 13-18     | 6              | 4, 5     | 17               |
| 3        | 19-23     | 5              | 6        | 21               |
| 4        | 25-32     | 9              | 7-9      | 27               |
| 5        | 34-39     | 6              | 10-12    | 37               |
| 6        | 40-47     | 8              | 13, 14   | 42               |
| 7        | 49-64     | 16             | 15-19    | 56               |

**Table S2. Thresholds for Positive Correlation.** The number n stands for the number of data points that make up the each of the biopeaks. The threshold was set to satisfy the lower limit of confidence interval for the population coefficient ( $\rho$ , 95 %) to be 0.5.

| Biopeak   | 1-3   | 4, 5  | 6     | 7-9   | 10-12 | 13, 14 | 15-19 |
|-----------|-------|-------|-------|-------|-------|--------|-------|
| n         | 12    | 6     | 5     | 9     | 6     | 8      | 16    |
| Threshold | 0.834 | 0.933 | 0.959 | 0.874 | 0.933 | 0.891  | 0.798 |

**Table S3. Bioactive Secondary Metabolites of *O. horridus* identified through MS database matching.** From left: compound number; compound name; the *K* value of the CCC fraction in which the compound eluted; GC retention time in minutes; correlation coefficient; mass spectral matching factor (MF) of rank 1,  $\delta MF_1$  as  $MF_1 - MF_2$ ; the probability that the candidate from the database is the unknown compound assuming the unknown is included in the database (Cp), GC peak area of the compound relative to the entire GC peak area of the run, in percent.

| #  | Name                                                                 | $K_D$ | GC rt (min) | <i>r</i> | MF <sub>1</sub> | $\delta MF_1$ | Probability % | Area% |
|----|----------------------------------------------------------------------|-------|-------------|----------|-----------------|---------------|---------------|-------|
| 1  | Oplopandiol                                                          | 0.60  | 20.109      | 0.96     | 870             |               |               | 15.7  |
| 2  | Falcarindiol                                                         | 0.60  | 19.916      | 0.91     | 867             |               | -             | 1.0   |
| 3  | 3,10-epoxy-3,7,11-trimethyldodeca-1,6-dien-11-ol                     | 2.15  | 16.902      | 0.53     | 857             |               | -             | 7.6   |
| 4  | 7,10-epoxy-3,7,11-trimethyldodec-1-ene-3,6,11-triol                  | 2.33  | 13.295      | 0.47     | 871             |               | -             | 0.3   |
| 5  | Sesamin                                                              | 0.44  | 31.903      | 0.32     | 910             |               | -             | 9.0   |
| 6  | 2-Octenoic acid                                                      | 0.78  | 8.565       | 0.97     | 906             | 31            | 53.3          | 0.4   |
| 7  | <i>n</i> -Decanoic acid                                              | 0.21  | 10.771      | 0.99     | 862             | 38            | 91.9          | 1.4   |
| 8  | 2,4-Undecadien-1-ol                                                  | 0.44  | 10.967      | 0.99     | 833             | 2             | 40.5          | 0.2   |
| 9  | 9-Oxononanoic acid                                                   | 1.48  | 12.305      | 0.97     | 874             | 30            | 53.5          | 0.8   |
| 10 | 9-Acetoxyxynonanal                                                   | 2.51  | 12.770      | 0.94     | 845             | 43            | 81.1          | 2.9   |
| 11 | <i>Z,Z</i> -10.12-Hexadecadien-1-ol acetate                          | 0.44  | 20.063      | 0.97     | 868             | 11            | 42.6          | 1.3   |
| 12 | Falcarinol                                                           | 0.60  | 18.919      | 0.88     | 819             | 10            | 40.4          | 0.6   |
| 13 | 1-Monoolein                                                          | 0.17  | 23.970      | 0.97     | 866             | 28            | 67.6          | 4.2   |
| 14 | 1-(1-Methylcyclopentyl)-ethanone                                     | 0.17  | 9.076       | 0.99     | 859             | 19            | 54.3          | 0.0   |
| 15 | 2-Hexylfuran                                                         | 0.17  | 10.276      | 0.99     | 829             | 22            | 53.7          | 0.0   |
| 16 | 7-(2-Furyl)heptanoate                                                | 0.60  | 14.470      | 0.90     | 803             | 19            | 51.5          | 0.9   |
| 17 | 1-Cyclopentoxycarbonyl-3-cyclopentylpropionic acid                   | 0.64  | 14.474      | 0.93     | 811             | 25            | 59.4          | 1.8   |
| 18 | 1,3-Dimethyl-(3,7-dimethyloctyl)cyclohexane                          | 0.99  | 16.907      | 0.89     | 884             | 16            | 44.4          | 0.9   |
| 19 | Cadinol                                                              | 0.17  | 12.926      | 0.98     | 883             | 12            | 43.6          | 0.3   |
| 20 | 5,9-Dimethyl-2-(1-methylethylidene)-1-cyclodecanone                  | 0.99  | 13.097      | 0.88     | 849             | 7             | 38.2          | 0.8   |
| 21 | 3,9(11)-Diene-10-peroxy-murolan                                      | 1.48  | 17.109      | 0.98     | 866             | 12            | 48.6          | 0.9   |
| 22 | CAS 109897-57-6                                                      | 2.33  | 13.286      | 0.88     | 863             | 10            | 41.5          | 1.0   |
| 23 | 3,3,8,8-Tetramethyl-tricyclo[5,1,0,0(2,4)]oct-5-ene-5-propenoic acid | 1.88  | 17.612      | 0.88     | 847             | 13            | 38.5          | 1.3   |
| 24 | 3-Hydroxy-4,4-dimethyl-3-(1-methyl-3-oxobut-1-enyl)cycloheptanone    | 0.44  | 15.640      | 0.98     | 840             | 9             | 37.2          | 0.6   |
| 25 | Ledol                                                                | 0.78  | 13.866      | 0.97     | 833             | 23            | 52.4          | 0.9   |
| 26 | Glaucyl alcohol                                                      | 0.99  | 17.350      | 0.87     | 859             | 46            | 76.7          | 1.7   |
| 27 | Spathulenol                                                          | 2.33  | 15.613      | 0.88     | 895             | 28            | 65.8          | 5.8   |
| 28 | Isoaromadendrene epoxide                                             | 1.48  | 15.915      | 0.99     | 826             | 30            | 63.3          | 7.7   |
| 29 | Dihydroartemisinin                                                   | 2.33  | 18.145      | 0.88     | 807             | 27            | 64.5          | 2.5   |
| 30 | Un-identified polyketide diyne                                       | 2.33  | 24.090      | 0.90     | -               | -             | -             | 7.8   |
